# Supplementary material for: A novel urea amperometric biosensor based on secretion of carnation petal cells modified on a graphite-epoxy composite electrode
Source: Royal Society of Chemistry journal article supplement (doi:10.1039/c0an00844c), 2010-12-13
Supplement: c0an00844c.pdf [file c0an00844c.pdf]

Supplemental information of figures and tables

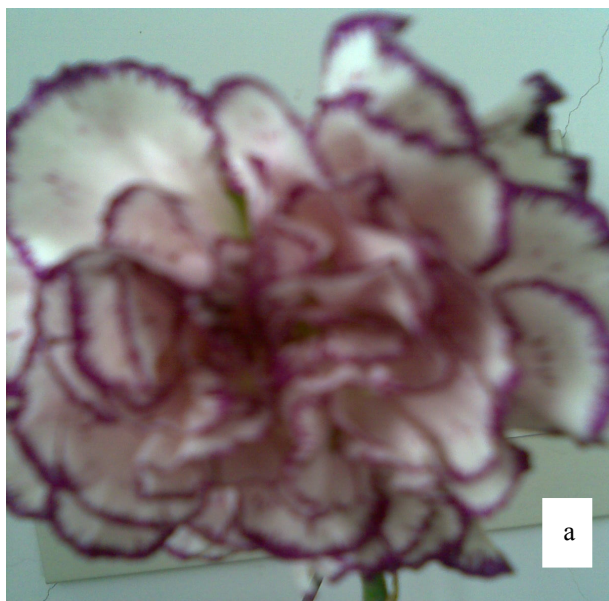

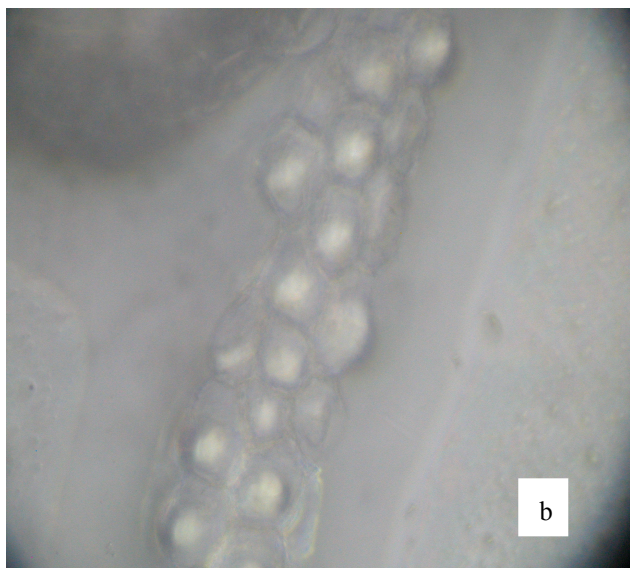

c

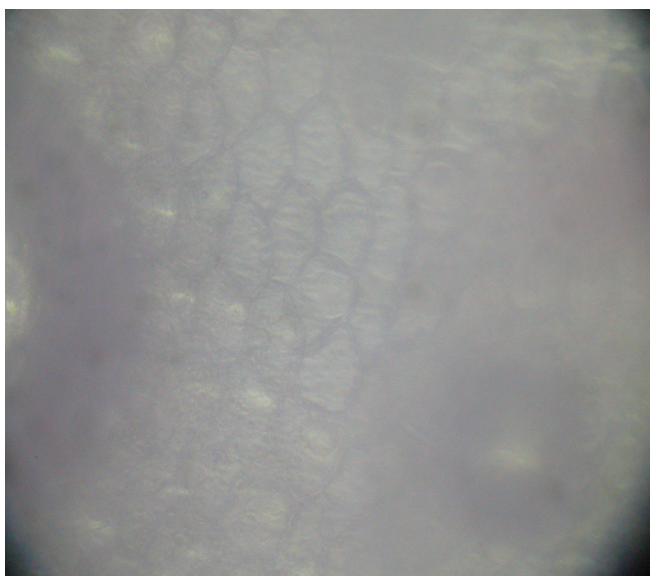

**Fig. 1** The photograph of carnation flower (a), and metallurgical microscopic images of the cells in carnation petals (b), and of the cells on the electrode surface in the paste (c) Under a metallurgical microscopy (Olympus, made in Japan, magnification $\times 150$ )

**Table.1.** The deviation data for urea determination

| No.                                              | 1                  | 2     | 3     | 4     | 5     | 6     | 7     | 8     | 9     | 10    |
|--------------------------------------------------|--------------------|-------|-------|-------|-------|-------|-------|-------|-------|-------|
| Peak current ( $\mu\text{A}$ )                   | 57.76              | 56.83 | 55.14 | 53.34 | 53.74 | 52.99 | 51.07 | 50.06 | 50.31 | 51.49 |
| The average of peak<br>current ( $\mu\text{A}$ ) | 53.27              |       |       |       |       |       |       |       |       |       |
| SD ( $\mu\text{A}$ )                             | 2.661 (RSD= 5.00%) |       |       |       |       |       |       |       |       |       |

**Table2.** The recovery of urea

|                      | Peak current ( $\mu\text{A}$ ) | Mount ( $\mu\text{M}$ ) |
|----------------------|--------------------------------|-------------------------|
| Urea in Sample       | 26.40                          | 0.175                   |
| Adding standard urea |                                | 0.909                   |
| Measured urea        | 16.24                          | 1.125                   |
| Recovery (%)         |                                | 104.5                   |
